# Supplementary material
Source: PubMed Central journal article supplement (PMC5860968)
Supplement: NIHMS929447-supplement-Supplemental.pdf [file NIHMS929447-supplement-Supplemental.pdf]

## SUPPLEMENTARY MATERIALS

“Bilingual cancer genetic education modules for the Deaf community: Development and evaluation of the online video material

### Supplementary Material

Table 1. Sample Characteristics for Focus group evaluation *N*=19

| <b>Characteristic</b>                                      | <b>No. (%)</b><br><b>Average (range)</b> |
|------------------------------------------------------------|------------------------------------------|
| Age, M (range), years                                      | 51.7 (24-77)                             |
| Female, No. (%)                                            | 10 (52.6)                                |
| College educated, No. (%)                                  | 15 (78.9)                                |
| Ethnicity/Race, No. (%)                                    |                                          |
| Non-Hispanic Caucasian                                     | 15 (78.9)                                |
| Hispanic                                                   | 0 (0)                                    |
| Asian                                                      | 3 (15.8)                                 |
| Black                                                      | 1 (5.3)                                  |
| Native American/American Indian                            | 0 (0)                                    |
| Other                                                      | 0 (0)                                    |
| Cultural affiliation, No. (%)                              |                                          |
| Deaf community                                             | 14(73.7)                                 |
| Deaf and Hearing communities                               | 5 (26.3)                                 |
| Hearing community                                          | 0                                        |
| Neither community                                          | 0                                        |
| Personal history of cancer <sup>a</sup> , No. (%)          | 1 (5.3)                                  |
| Family history of cancer <sup>b</sup> , No. (%)            | 11 (57.9)                                |
| Prior genetic counseling or testing <sup>c</sup> , No. (%) | 10 (52.6)                                |

<sup>a</sup> colon cancer

<sup>b</sup> breast, ovarian, colon or unknown

<sup>c</sup> includes participation in Deaf Genetics Project

## SUPPLEMENTARY MATERIALS

“Bilingual cancer genetic education modules for the Deaf community: Development and evaluation of the online video material

**Supplementary Table 2**

Table 2. Evaluation of the prototype and final CGEM product

|                                                                                                                            | <b>Focus Group Participants<sup>a</sup></b> | <b>Community participants<sup>b</sup></b> | <b>CGEM participants<sup>c</sup></b> |
|----------------------------------------------------------------------------------------------------------------------------|---------------------------------------------|-------------------------------------------|--------------------------------------|
| <b>Video viewed<sup>d</sup></b>                                                                                            | Samples A & B                               | Sample A or B                             | Bilingual version-Full product       |
| <b>Message Comprehension -- % correct</b>                                                                                  |                                             |                                           |                                      |
| On Anna’s family tree, Anna’s mother’s side of the family was on the: RIGHT (middle, left)                                 | 55.5%                                       | 41.4%                                     | --                                   |
| Anna’s risk for breast/ovarian cancer is: HIGHER THAN MOST PEOPLE (same, lower)                                            | 22.2%                                       | 40.7%                                     | --                                   |
| Can a man develop breast cancer? YES (no, unsure)                                                                          | 77.8%                                       | 55.2%                                     | 86.6%                                |
| The male symbol on the family tree is shown as a: SQUARE (circle, diamond)                                                 | --                                          | --                                        | 84.5%                                |
| According to Anna’s family tree, her risk for inheriting breast or ovarian cancer is the same as most people: FALSE (true) | --                                          | --                                        | 56.7%                                |
| A person with a genetic predisposition for cancer has: A HIGHER RISK OF DEVELOPING CANCER THAN MOST PEOPLE (same, lower)   | --                                          | --                                        | 75.3%                                |
| <b>Viewer Engagement &amp; Motivation</b>                                                                                  |                                             |                                           |                                      |
| How interested are you in making your own family health history tree? VERY INTERESTED (somewhat; not at all)               | 62.5%                                       | 57%                                       | --                                   |
| How confident are you in developing your own family tree? VERY CONFIDENT (somewhat; not at all)                            | --                                          | --                                        | 43.7% <sup>e</sup>                   |
| Would you tell your friends and family about this video? YES (maybe, no)                                                   | 77.8%                                       | 57%                                       | --                                   |
| How likely would you recommend this Educational Module to your family or friends? DEFINITELY (very; somewhat; not at all)  | --                                          | --                                        | 55.3% <sup>e</sup>                   |
| <b>Design Features</b>                                                                                                     |                                             |                                           |                                      |
| Quizzes helped you understand the information presented in the video: YES (no)                                             | 88.9%                                       | 90%                                       | --                                   |

## SUPPLEMENTARY MATERIALS

“Bilingual cancer genetic education modules for the Deaf community: Development and evaluation of the online video material

|                                                                                                                              |                                                                                                     |                                 |                    |
|------------------------------------------------------------------------------------------------------------------------------|-----------------------------------------------------------------------------------------------------|---------------------------------|--------------------|
| Annoying to answer quiz questions: NO (yes)                                                                                  | 100%                                                                                                | 71%                             | 86.3% <sup>e</sup> |
| Video was too long to watch: NO (yes)                                                                                        | 100%                                                                                                | 86.2%                           | 68.4% <sup>e</sup> |
| ASL speed was: GOOD (too fast; too slow)                                                                                     | 100%                                                                                                | 93%                             | 95.7% <sup>e</sup> |
| The information in the video was clear and easy to understand: YES (no; it was okay but not great)                           | 88.9%                                                                                               | 79%                             | --                 |
| The Educational Module explains things in terms I understand. YES                                                            | --                                                                                                  | --                              | 91.6% <sup>e</sup> |
| Graphics in the video were distracting: NO (yes)                                                                             | 100%                                                                                                | 48.3%                           | --                 |
| Pictures in the video HELPED ME UNDERSTAND THE INFORMATION (did not help; I did not pay attention to the pictures)           | 100%                                                                                                | 82%                             | --                 |
| The English text/captions were easy to read while watching the video: YES (no; it does not matter I do not use English text) | 78%                                                                                                 | Sample A: 100%<br>Sample B: 81% | --                 |
| Which group had better English text/captions for video?                                                                      | Sample A: 33.3%<br>Sample B: 44.4%<br>Doesn't matter because I don't use English captions:<br>22.2% | n/a                             | --                 |
| Liked where English text was placed: YES (no; it was okay; it does not matter I do not use English text)                     | n/a                                                                                                 | Sample A: 71%<br>Sample B: 81%  | --                 |
| Liked the format: YES (no; indifferent)                                                                                      | --                                                                                                  | --                              | 84.9% <sup>e</sup> |

<sup>a</sup> Focus group participants completed one survey after they evaluated Samples A and B – *N*=9

<sup>b</sup> MATA participants were assigned to view only one video, and then they completed a survey about that video (Sample A, *n*=14; Sample B, *n*=16)

<sup>c</sup> CGEM participants – *N*=100 randomized to the bilingual (ASL + English captioned) version

<sup>d</sup> Sample A video: ASL + English text; Sample B video: ASL + English closed captioning

<sup>e</sup> Results published in Palmer et al. (2016)

## SUPPLEMENTARY MATERIALS

“Bilingual cancer genetic education modules for the Deaf community: Development and evaluation of the online video material

**Supplementary Table 3**

Table 3 Sample Characteristics for CGEM evaluation  $N=97^a$

| Characteristic                                             | No. (%)<br>Average (SD) |
|------------------------------------------------------------|-------------------------|
| Deaf or hard-of-hearing, No. (%)                           |                         |
| Deaf                                                       | 92 (97.9)               |
| Hard-of-hearing                                            | 4 (4.1)                 |
| Other <sup>b</sup>                                         | 1 (1.0)                 |
| Primary communication mode with deaf individuals, No. (%)  |                         |
| ASL                                                        | 93 (95.9)               |
| PSE, SEE, SIM-COM                                          | 12 (12.4)               |
| Orally                                                     | 1 (1.0)                 |
| In writing                                                 | 2 (2.1)                 |
| Age, M (SD), years                                         | 44.7 (14.6)             |
| Female, No. (%)                                            | 60 (61.9)               |
| High school diploma or less, No. (%)                       | 30 (30.9)               |
| Ethnicity/Race, No. (%)                                    |                         |
| Non-Hispanic Caucasian                                     | 63 (66.3)               |
| Hispanic                                                   | 18 (18.9)               |
| Asian                                                      | 6 (6.3)                 |
| Black                                                      | 4 (4.2)                 |
| Native American/American Indian                            | 1 (1.0)                 |
| Other                                                      | 3 (3.2)                 |
| Cultural affiliation, No. (%)                              |                         |
| Deaf community                                             | 59 (59.8)               |
| Deaf and Hearing communities                               | 39 (40.2)               |
| Hearing community                                          | 0                       |
| Neither community                                          | 0                       |
| Personal/family history of cancer <sup>c</sup> , No. (%)   | 56 (57.7)               |
| Prior genetic counseling or testing <sup>d</sup> , No. (%) | 39 (40.2)               |
| Pre-test knowledge score, M (SD)                           | 18.4 (3.3)              |
| TGJASL-R score <sup>e</sup> , M (SD)                       | 0.75 (0.15)             |
| Read English well <sup>f</sup> , M (SD)                    | 8.0 (1.9)               |
| Time spent viewing materials, M (SD), minutes              | 48.4 (18.7)             |
| Pause, play, and seek event count, Median; M (SD)          | 17; 49.2 (84.0).        |

<sup>a</sup> Adapted from Palmer et al. (2016)

<sup>b</sup> Participant response was “oral deaf”

<sup>c</sup> breast, ovarian, or colon cancer

<sup>d</sup> includes participation in Deaf Genetics Project

<sup>e</sup> TGJASL-R: ASL Grammar Judgement Task. >0.5-1 reflects increasing grammatical accuracy; 0.5 reflects random guessing; <0.5 reflects systematic bias

<sup>f</sup> self-rated on scale of 0 (low) – 10 (high)
